# Supplementary material for: ATP hydrolysis-coupled peptide translocation mechanism of Mycobacterium tuberculosis ClpB
Source: PubMed Central journal article supplement — Proc Natl Acad Sci U S A. 2018 Sep 26;115(41):E9560–9. doi: 10.1073/pnas.1810648115 (PMC6187150; doi:10.1073/pnas.1810648115), 2018-09-26
Supplement: pnas.1810648115.sapp.pdf [file pnas.1810648115.sapp.pdf]

## Supplementary Information for

### **ATP hydrolysis-coupled peptide translocation mechanism of Mycobacterium tuberculosis ClpB**

Hongjun Yu, Tania J. Lupoli, Amanda Kovach, Xing Meng, Gongpu Zhao, Carl F.  
Nathan\*, and Huilin Li\*

\* For correspondence: cnathan@med.cornell.edu or [Huilin.Li@vai.org](mailto:Huilin.Li@vai.org)

#### **This PDF file includes:**

Figs. S1 to S6  
Tables S1  
Caption for movies S1

#### **Other supplementary materials for this manuscript include the following:**

Movies S1

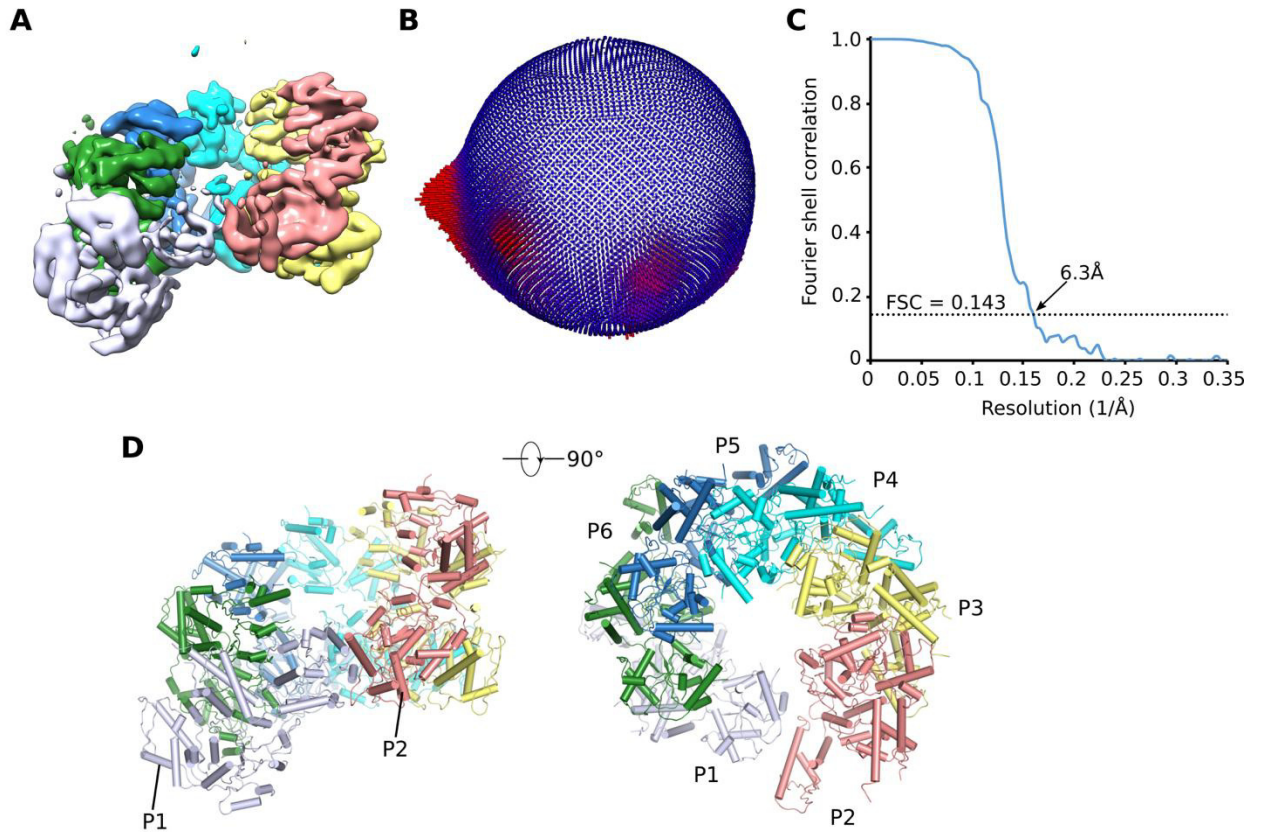

**Fig. S1. Cryo-EM 3D reconstruction of *Mtb* ClpB in complex with AMPPNP.** (A) 3D density map of ClpB complexed with AMPPNP. (B) Eulerian angle distribution of all particles used in the 3D reconstruction, shown in the same orientation as in panel A. (C) The gold-standard Fourier shell correlation (FSC) curve of the map. (D) A side view (left) and a top view (right) of the atomic model. The model was derived by rigid-body docking of the NBD1 and NBD2 structures of P5 promoter of *Mtb* ClpB Conformer 1.

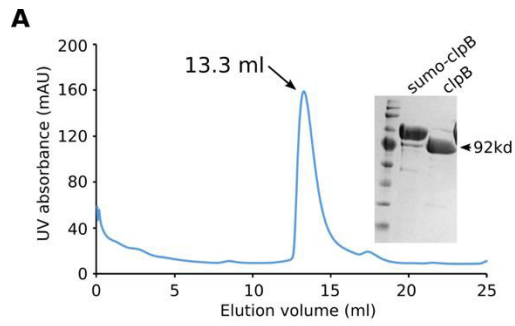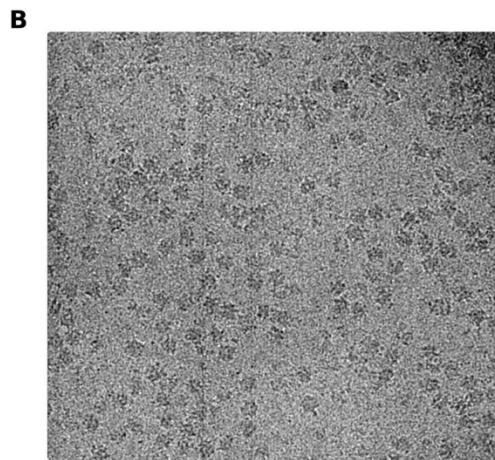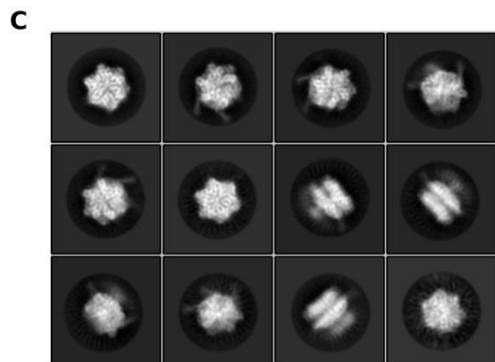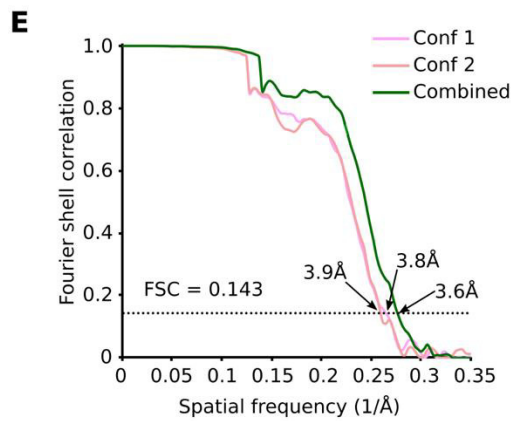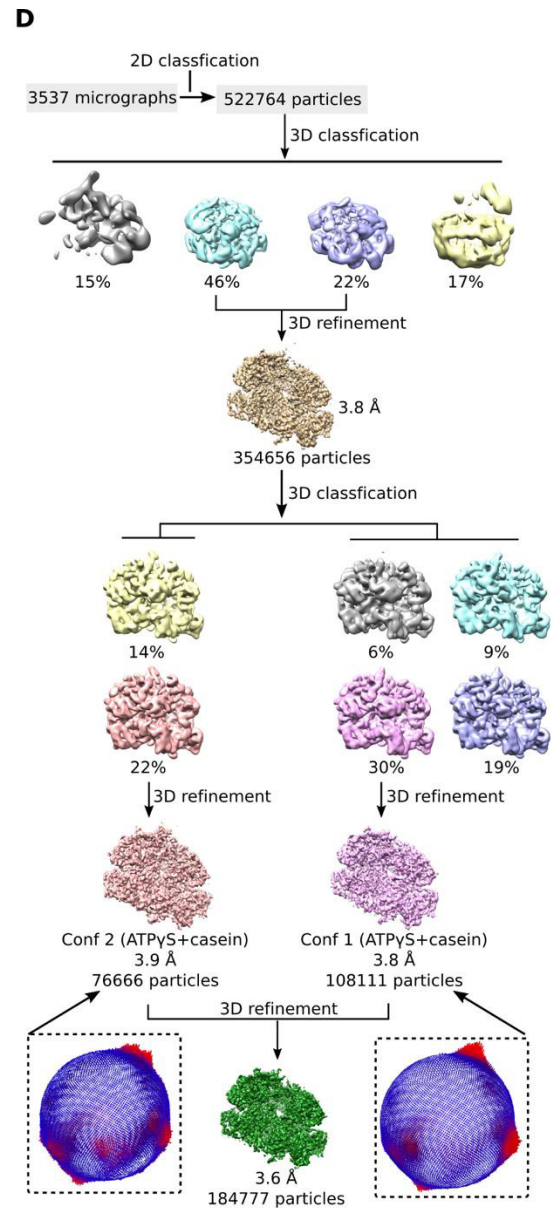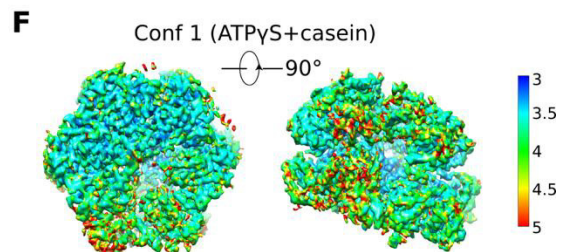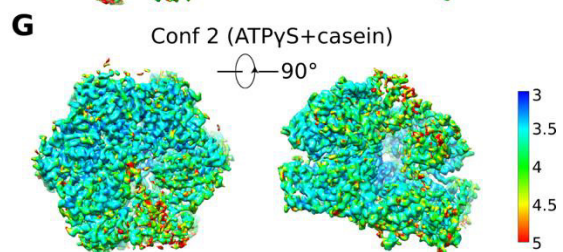

**Fig. S2. Cryo-EM analysis of *Mtb* ClpB in complex of casein and ATP $\gamma$ S. (A)** Gel filtration profile of ClpB (Superose 6 10/300 GL column). Inset is an SDS-PAGE of ClpB before and after removal of the sumo tag. **(B)** Representative cryo-EM micrograph. **(C)** Representative 2D class averages. **(D)** The work flow of cryo-EM data processing. Insets with dashed boxes are angular distribution of all particles used in the corresponding 3D reconstructions. **(E)** The gold-standard Fourier shell correlation (FSC) curve of the corresponding 3D maps. **(F-G)** Local resolution of the 3D density maps of Conformer 1 **(F)** and Conformer 2 **(G)**, calculated with ResMap.

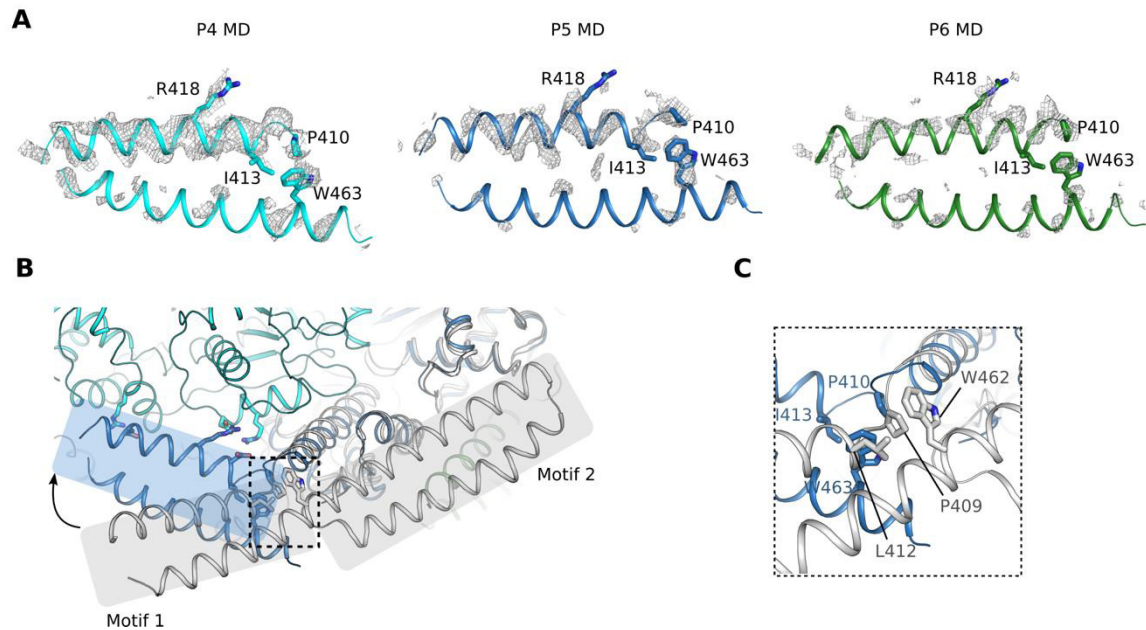

**Fig. S3. Analysis of the MD conformations.** (A) Cryo-EM density of motif 1 of the MD domains of ‘tight’ protomers P4, P5 and P6 in Conformer 1. The structure of MD motif 1 extracted from the crystal structure of *E. coli* ClpB (PDB ID 4CIU), 56% identical to the *Mtb* protein, fitted well in this density as a rigid-body. (B) The MD domain motif 1 of protomer P5 (blue) adopted a conformation that interacts with adjacent protomer P4 while its MD motif 2 was dynamic. An *E. coli* ClpB protomer structure in the MD motif 1-unbracing form (PDB ID 4CIU; grey) was superimposed on NBD1 of P5 (blue) of *Mtb* ClpB. This comparison showed that a rotation around the central hydrophobic region between motifs 1 and 2 interconverted the unbracing and bracing forms of the MD motif 1. (C) An enlarged view of the hydrophobic region in the MD domain, highlighted by a dashed box in panel B.

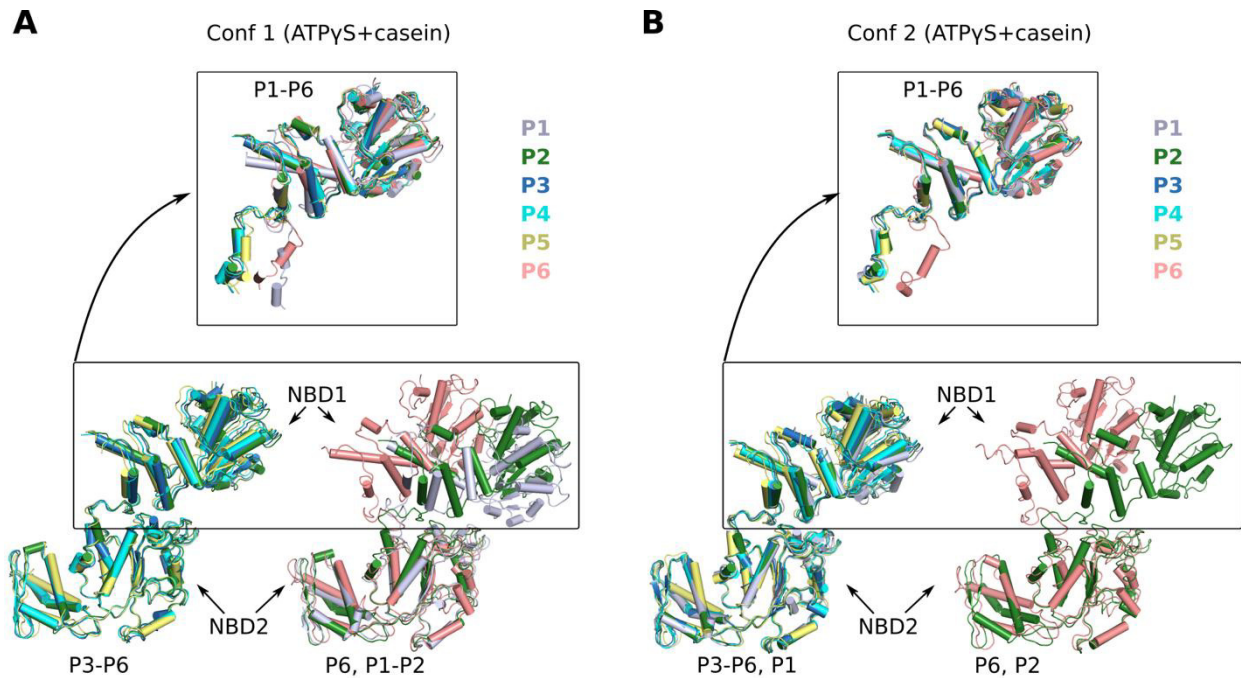

**Fig. S4. Conformational differences among individual protomers of *Mtb* ClpB. (A)** Conformer 1. **(B)** Conformer 2. Bottom, the six protomers were aligned by their respective NBD2 domains. The NBD2 domains of the six protomers in both conformers were superimposable. The NBD1 domains of P1-P2 in Conformer 1 **(A)** and NBD1 of P2 in Conformer 2 **(B)** moved the most among the six protomers. Top, in both Conformer 1 and 2, the NBD1 domains of all six protomers could be superposed among themselves. These comparisons indicated that the individual NBD1 and NBD2 domain structures were largely unchanged; the conformational differences were due to rigid-body motions of these NBD1 and NBD2 domains.

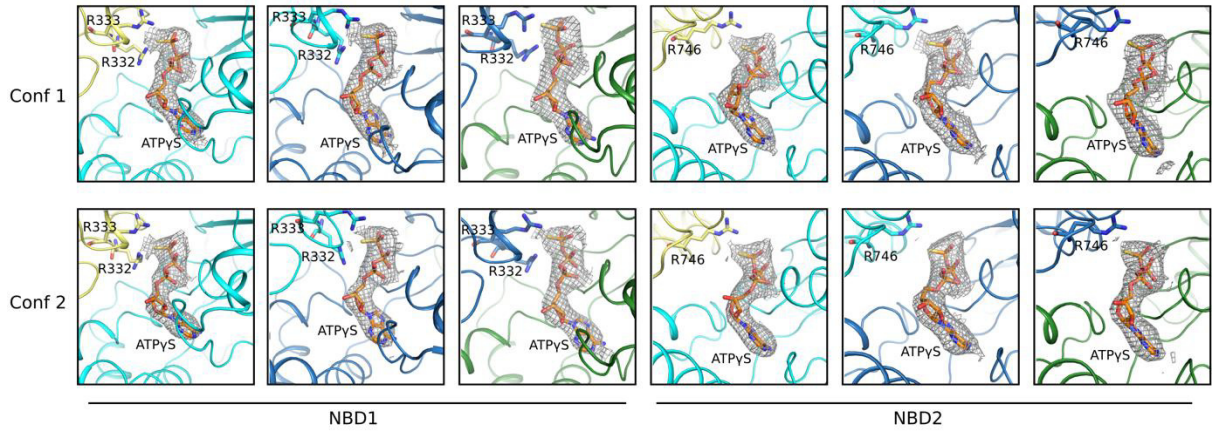

**Fig. S5. Nucleotide states of protomers P4, P5 and P6 in Conformer 1 and 2.**  
 Bound ATP $\gamma$ S in their NBD1 and NBD2 were superposed with densities displayed at the same threshold as that in **Fig. 5C**.

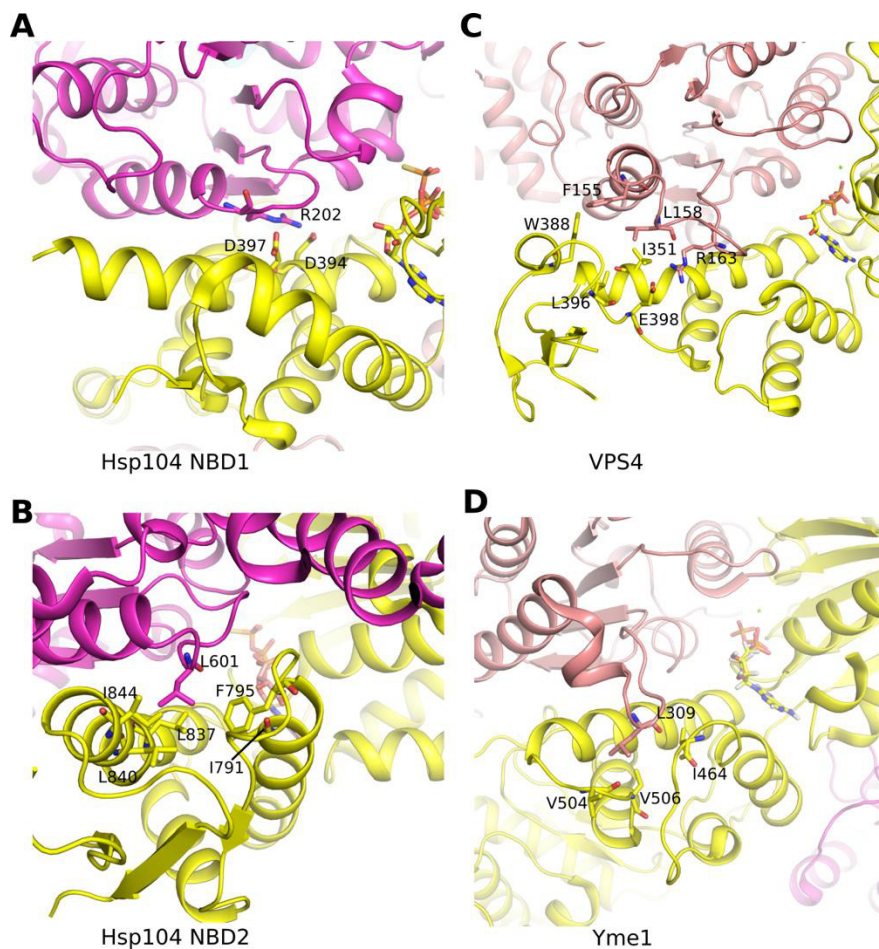

**Fig. S6. The inter-protomer interactions outside the nucleotide sites in *Mtb* ClpB were similar to those of several other peptide-translocation ATPases. (A, B) NBD1 and NBD2 domains of Hsp104 (PDB ID 5VJH); (C) VPS4 (PDB ID 6AP1); (D) Yme1 (PDB ID 6AZ0). These inter-protomer interactions were of similar topologies and involved two similarly positioned moieties: (1) one or two  $\alpha$ -helices of the small helical domain adjacent to the nucleotide binding site; (2) a loop connected to the  $\beta$ -stand preceding the Walker A motif of an adjacent protomer.**



**Table S1.** Cryo-EM data collection parameters and structure refinement statistics.

| <b>Ligands complexed with <i>Mtb</i>ClpB</b> | ATP $\gamma$ S+Casein | ATP $\gamma$ S+Casein | ATP $\gamma$ S+Casein | AMPPNP     |
|----------------------------------------------|-----------------------|-----------------------|-----------------------|------------|
|                                              | Combined*             | Conformer 1           | Conformer 2           |            |
| <b>EMDB ID</b>                               | EMD-9027              | EMD-7942              | EMD-7943              | EMD-9028   |
| <b>PDB ID</b>                                | -                     | 6DJU                  | 6DJV                  | 6ED3       |
| <b>Data collection</b>                       |                       |                       |                       |            |
| Microscope                                   | FEI Titan Krios       |                       |                       |            |
| Voltage (kV)                                 | 300                   |                       |                       |            |
| Detector                                     | Gatan K2 Summit       |                       |                       |            |
| Electron dose (e $^{-}$ /Å $^2$ )            | 52                    |                       |                       |            |
| Pixel size (Å)                               | 1.07                  |                       |                       |            |
| Defocus range ( $\mu$ m)                     | 1.1-3                 |                       |                       |            |
| <b>Reconstruction</b>                        |                       |                       |                       |            |
| Software                                     | RELION 2.0            | RELION 2.0            | RELION 2.0            | RELION 2.0 |
| Particles for final refinement               | 184,777               | 108,111               | 76,666                | 112,043    |
| Final Resolution (Å)                         | 3.6                   | 3.8                   | 3.9                   | 6.3        |
| Map-sharpening B factor (Å $^2$ )            | -127.0                | -121.2                | -128.3                | -244.1     |
| <b>Model composition</b>                     |                       |                       |                       |            |
| Protein chains                               |                       | 7                     | 7                     |            |
| Protein residues                             |                       | 3455                  | 3481                  |            |
| Nucleotides                                  |                       | 12                    | 12                    |            |
| <b>R.m.s. deviations</b>                     |                       |                       |                       |            |
| Bond lengths (Å)                             |                       | 0.007                 | 0.006                 |            |
| Bond angles ( $^{\circ}$ )                   |                       | 1.139                 | 1.099                 |            |
| <b>Ramachandran plot</b>                     |                       |                       |                       |            |
| Favored (%)                                  |                       | 86.4                  | 87.1                  |            |
| Outlier (%)                                  |                       | 0.6                   | 0.4                   |            |
| <b>Validation</b>                            |                       |                       |                       |            |
| Molprobit score                              |                       | 1.9                   | 1.9                   |            |
| Rotamer outlier (%)                          |                       | 0.9                   | 0.7                   |            |
| Clashscore                                   |                       | 6.0                   | 6.2                   |            |

\*Atomic model was not built because of the mixed states of mobile protomers P1 and P2 (Fig. 1C-D).

**Movie S1. Atomic trajectories of substrate translocation by *Mtb* ClpB.** The movie was made by morphing from Stage 1 to Stage 2 and subsequently from Stage 2 to Stage 3 as illustrated in **Fig. 6B**.
